# Supplementary material
Source: PubMed Central journal article supplement (PMC3205953)
Supplement: NIHMS317350-supplement-1_si_001.pdf [file NIHMS317350-supplement-1_si_001.pdf]

# The A53T Mutation is Key in Defining the Differences in the Aggregation Kinetics of Human and Mouse $\alpha$ -synuclein

Lijuan Kang,<sup>†</sup> Kuen-Phon Wu,<sup>†</sup> Michele Vendruscolo<sup>‡</sup> and Jean Baum<sup>†§\*</sup>

<sup>†</sup>Department of Chemistry and Chemical Biology, Rutgers University, 610 Taylor Road, Piscataway, New Jersey 08854, USA

<sup>§</sup>BioMaPS Institute for Quantitative Biology, Rutgers University, Piscataway, New Jersey 08854, USA

<sup>‡</sup>Department of Chemistry, University of Cambridge, Cambridge CB2 1EW, UK.

*Keywords: Amyloid fibril formation | Nuclear magnetic resonance | Fluorescence | Intrinsically disordered protein | Parkinson's diseases*

## Corresponding Author

\* Jean Baum: jean.baum@rutgers.edu

## Supporting Information

Complete reference 8:

- (8) Polymeropoulos, M. H.; Lavedan, C.; Leroy, E.; Ide, S. E.; Dehejia, A.; Dutra, A.; Pike, B.; Root, H.; Rubenstein, J.; Boyer, R.; Stenroos, E. S.; Chandrasekharappa, S.; Athanassiadou, A.; Papapetropoulos, T.; Johnson, W. G.; Lazzarini, A. M.; Duvoisin, R. C.; Di Iorio, G.; Golbe, L. I.; Nussbaum, R. L. *Science* 1997, 276, 2045.

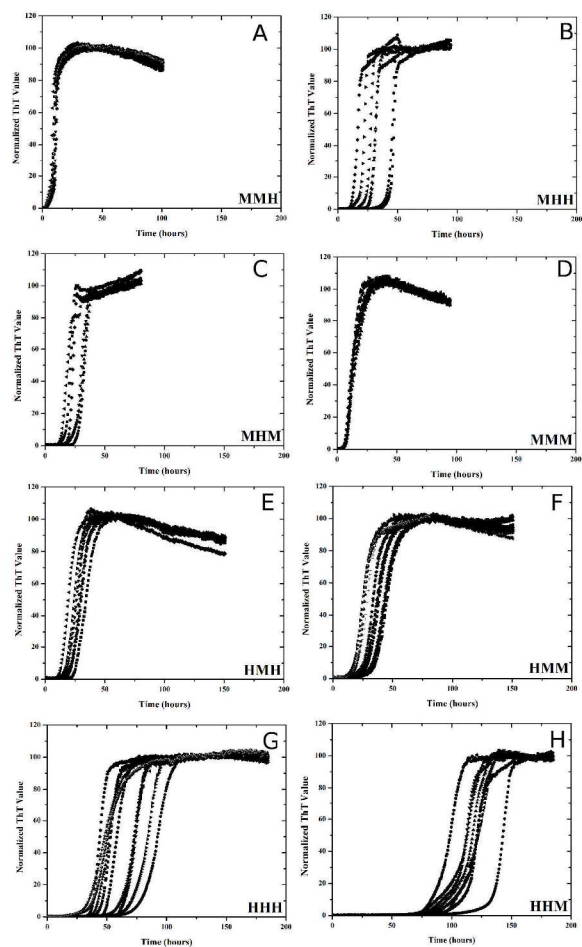

**Figure S1.** The normalized time course fibril growth curves for all the  $\alpha$ Syn variants. MMH (A), MHH (B), MHM (C), MMM (D), HMH (E), HMM (F), HHH (G) and HHM (H) are shown in each panel.

**Table S1.** The alignment of 27 complete  $\alpha$ Syn sequences generated by BLAST and aligned with ClustalW2. The common name and primary access number of each sequence is shown in the first column. Human and mouse  $\alpha$ Syn are highlighted with blue and yellow separately. The seven different residues between human and mouse  $\alpha$ Syn are marked in red.

|                                        |   |                            |    |
|----------------------------------------|---|----------------------------|----|
| Zebra Finch (Q4JHT6)                   | 1 | -----MDVFMKGLSKAKEGVVAAAEK | 21 |
| Zebra Finch (B5G014)                   | 1 | -----MDVFMKGLSKAKEGVVAAAEK | 21 |
| Zebra Finch (B5G015)                   | 1 | -----MDVFMKGLSKAKEGVVAAAEK | 21 |
| Island canary (Q91448)                 | 1 | -----MDVFMKGLSKAKEGVVAAAEK | 21 |
| Chicken (Q9I9H1)                       | 1 | -----MDVFMKGLNKAKEGVVAAAEK | 21 |
| Rat (P37377)                           | 1 | -----MDVFMKGLSKAKEGVVAAAEK | 21 |
| Mouse (O55042)                         | 1 | -----MDVFMKGLSKAKEGVVAAAEK | 21 |
| Common woolly monkey (P61141)          | 1 | -----MDVFMKGLSKAKEGVVAAAEK | 21 |
| Black-handed spider monkey (P61138)    | 1 | -----MDVFMKGLSKAKEGVVAAAEK | 21 |
| Red-chested mustached tamarin (P61147) | 1 | -----MDVFMKGLSKAKEGVVAAAEK | 21 |
| Common squirrel monkey (D0FH84)        | 1 | -----MDVFMKGLSKAKEGVVAAAEK | 21 |
| Rhesus macaque (P61143)                | 1 | -----MDVFMKGLSKAKEGVVAAAEK | 21 |
| Crab-eating macaque (P61142)           | 1 | -----MDVFMKGLSKAKEGVVAAAEK | 21 |
| Red guenon (P61139)                    | 1 | -----MDVFMKGLSKAKEGVVAAAEK | 21 |
| Lowland gorilla (P61140)               | 1 | -----MDVFMKGLSKAKEGVVAAAEK | 21 |
| Human (P37840-3)                       | 1 | -----MDVFMKGLSKAKEGVVAAAEK | 21 |
| Human (P37840)                         | 1 | -----MDVFMKGLSKAKEGVVAAAEK | 21 |
| Pygmy chimpanzee (P61144)              | 1 | -----MDVFMKGLSKAKEGVVAAAEK | 21 |
| Chimpanzee (P61145)                    | 1 | -----MDVFMKGLSKAKEGVVAAAEK | 21 |
| Sumatran orangutan (P61146)            | 1 | -----MDVFMKGLSKAKEGVVAAAEK | 21 |
| Pig (Q3I5G7)                           | 1 | -----MDVFMKGLSKAKEGVVAAAEK | 21 |
| Bovin (Q3T0G8)                         | 1 | -----MDVFMKGLSKAKEGVVAAAEK | 21 |

|                                        |    |                                                    |    |
|----------------------------------------|----|----------------------------------------------------|----|
| Human (P37840-2)                       | 1  | -----MDVFMKGLSKAKEGVVAAAEK                         | 21 |
| African clawed frog (Q7SZ02)           | 1  | -----MDVFMKGLSKAKEGVVAAAEK                         | 21 |
| Zebra finch (B5G012)                   | 1  | -----MDVFMKGLSKAKEGVVAAAEK                         | 21 |
| Japanese pufferfish (Q3LU31)           | 1  | -----MDAFMKGF SKAKDGVVAAAEK                        | 21 |
| Northern pike (C1BYT3)                 | 1  | MGTGYQVLQGADCIAGFEISRKAVNWAVMDALMKGF SKAKDGVVAAAEK | 50 |
|                                        |    |                                                    |    |
| Zebra Finch (Q4JHT6)                   | 22 | TKQGVAAEAGKTKEGVLYVGSRTKEGVVHGVTTVAEKTKEQVSNVGGAVV | 71 |
| Zebra Finch (B5G014)                   | 22 | TKQGVAAEAGKTKEGGVYVGSRTKEGVVHGVTTVAEKTKEQVSNVGGAVV | 71 |
| Zebra Finch (B5G015)                   | 22 | TKQGVAAEAGKTKEGVLYVGSRTKEGVVHGVTTVAEKTKEQVFFVPPAVV | 71 |
| Island canary (Q91448)                 | 22 | TKQGVAAEAGKTKEGVLYVGSRTKEGVVHGVTTVAEKTKEQVSNVGGAVV | 71 |
| Chicken (Q9I9H1)                       | 22 | TKQGVAAEAGKTKEGVLYVGSRTKEGVVHGVTTVAEKTKEQVSNVGGAVV | 71 |
| Rat (P37377)                           | 22 | TKQGVAAEAGKTKEGVLYVGSRTKEGVVHGVTTVAEKTKEQVTNVGGAVV | 71 |
| Mouse (O55042)                         | 22 | TKQGVAAEAGKTKEGVLYVGSRTKEGVVHGVTTVAEKTKEQVTNVGGAVV | 71 |
| Common woolly monkey (P61141)          | 22 | TKQGVAAEAGKTKEGVLYVGSRTKEGVVHGVTTVAEKTKEQVTSVGGAVV | 71 |
| Black-handed spider monkey (P61138)    | 22 | TKQGVAAEAGKTKEGVLYVGSRTKEGVVHGVTTVAEKTKEQVTSVGGAVV | 71 |
| Red-chested mustached tamarin (P61147) | 22 | TKQGVAAEAGKTKEGVLYVGSRTKEGVVHGVTTVAEKTKEQVTNVGGAVV | 71 |
| Common squirrel monkey (D0FH84)        | 22 | TKQGVAAEAGKTKEGVLYVGSRTKEGVVHGVATVAEKTKEQVTNVGGAVV | 71 |
| Rhesus macaque (P61143)                | 22 | TKQGVAAEAGKTKEGVLYVGSRTKEGVVHGVATVAEKTKEQVTNVGGAVV | 71 |
| Crab-eating macaque (P61142)           | 22 | TKQGVAAEAGKTKEGVLYVGSRTKEGVVHGVATVAEKTKEQVTNVGGAVV | 71 |
| Red guenon (P61139)                    | 22 | TKQGVAAEAGKTKEGVLYVGSRTKEGVVHGVATVAEKTKEQVTNVGGAVV | 71 |
| Lowland gorilla (P61140)               | 22 | TKQGVAAEAGKTKEGVLYVGSRTKEGVVHGVATVAEKTKEQVTNVGGAVV | 71 |
| Human (P37840-3)                       | 22 | TKQGVAAEAGKTKEGVLYV-----VAEKTKEQVTNVGGAVV          | 57 |
| Human (P37840)                         | 22 | TKQGVAAEAGKTKEGVLYVGSRTKEGVVHGVATVAEKTKEQVTNVGGAVV | 71 |
| Pygmy chimpanzee (P61144)              | 22 | TKQGVAAEAGKTKEGVLYVGSRTKEGVVHGVATVAEKTKEQVTNVGGAVV | 71 |
| Chimpanzee (P61145)                    | 22 | TKQGVAAEAGKTKEGVLYVGSRTKEGVVHGVATVAEKTKEQVTNVGGAVV | 71 |
| Sumatran orangutan (P61146)            | 22 | TKQGVAAEAGKTKEGVLYVGSRTKEGVVHGVATVAEKTKEQVTNVGGAVV | 71 |
| Pig (Q3I5G7)                           | 22 | TKQGVAAEAGKTKEGVLYVGSRTKEGVVHGVTTVAEKTKEQVTNVGEAVV | 71 |

|                                        |    |                                                    |     |
|----------------------------------------|----|----------------------------------------------------|-----|
| Bovin (Q3T0G8)                         | 22 | TKQGVAAEAGRTKEGVLYVGSKTKEGVVHGVTTVAEKTKEQVTNVGEAVV | 71  |
| Human (P37840-2)                       | 22 | TKQGVAAEAGKTKEGVLYVGSKTKEGVVHGVATVAEKTKEQVTNVGGAVV | 71  |
| African clawed frog (Q7SZ02)           | 22 | TKQGVAAEAGKTKEGVLYVGSKTKEGVVHGVTTVAEKTKEQVSNVGGAVV | 71  |
| Zebra finch (B5G012)                   | 22 | TKQGVAAEAGKTKEGVLYVGSRTKEGVVHGVTTVAEKTKEQVSNVGGAVV | 71  |
| Japanese pufferfish (Q3LU31)           | 22 | TKQGVGTAAEMTKDGVMFVGTKTKDG----VTVVAGKTVSGVSQVGGAMV | 67  |
| Northern pike (C1BYT3)                 | 51 | TKQGVGTAAEMTKDGVIFVGNKTKDG----VTVVAGKTVSGVSHVGGAMV | 96  |
|                                        |    |                                                    |     |
| Zebra Finch (Q4JHT6)                   | 72 | TGVTAVAQKTVEGAGNIAAATGLVKKDQLAKQNEEGFLQEGMVNNTG-VA | 120 |
| Zebra Finch (B5G014)                   | 72 | TGVTAVAQKTVEGAGNIAAATGLVKKDQLAKQNEEGFLQEGMVNNTG-VA | 120 |
| Zebra Finch (B5G015)                   | 72 | TGVTAKTQKTVEGAGNIAAATGLAKKDQLAKQNEEGFLQEGMVNNTG-VA | 120 |
| Island canary (Q91448)                 | 72 | TGVTAVAQKTVEGAGNIAAATGLVKKDQLAKQNEEGFLQEGMVNNTG-AA | 120 |
| Chicken (Q9I9H1)                       | 72 | TGVTAVAQKTVEGAGNIAAATGLVKKDQLAKQNEEGFLQEGMVNNTD-IP | 120 |
| Rat (P37377)                           | 72 | TGVTAVAQKTVEGAGNIAAATGFVKKDQMGKG-EEGYPQEGILEDM---P | 117 |
| Mouse (O55042)                         | 72 | TGVTAVAQKTVEGAGNIAAATGFVKKDQMGKG-EEGYPQEGILEDM---P | 117 |
| Common woolly monkey (P61141)          | 72 | TGVTAVAQKTVEGAGNIAAATGFVKKDHSKGK-EEGAPQEGILEDM---P | 117 |
| Black-handed spider monkey (P61138)    | 72 | TGVTAVAQKTVEGAGNIAAATGFVKKDHSKGK-EEGAPQEGILEDM---P | 117 |
| Red-chested mustached tamarin (P61147) | 72 | TGVTAVAQKTVEGAGNIAAATGFVRKDHLGKS-EEGAPQEGILEDM---P | 117 |
| Common squirrel monkey (D0FH84)        | 72 | TGVTAVAQKTVEGAGNIAAATGFVKKDHLGKS-EEGAPQEGILEDM---P | 117 |
| Rhesus macaque (P61143)                | 72 | TGVTAVAQKTVEGAGSIAAATGFVKKDQLGKN-EEGAPQEGILQDM---P | 117 |
| Crab-eating macaque (P61142)           | 72 | TGVTAVAQKTVEGAGSIAAATGFVKKDQLGKN-EEGAPQEGILQDM---P | 117 |
| Red guenon (P61139)                    | 72 | TGVTAVAQKTVEGAGSIAAATGFVKKDQLGKN-EEGAPQEGILQDM---P | 117 |
| Lowland gorilla (P61140)               | 72 | TGVTAVAQKTVEGAGSIAAATGFVKKDQLGKN-EEGAPQEGILEDM---P | 117 |
| Human (P37840-3)                       | 58 | TGVTAVAQKTVEGAGSIAAATGFVKKDQLGKN-EEGAPQEGILEDM---P | 103 |
| Human (P37840)                         | 72 | TGVTAVAQKTVEGAGSIAAATGFVKKDQLGKN-EEGAPQEGILEDM---P | 117 |
| Pygmy chimpanzee (P61144)              | 72 | TGVTAVAQKTVEGAGSIAAATGFVKKDQLGKN-EEGAPQEGILEDM---P | 117 |
| Chimpanzee (P61145)                    | 72 | TGVTAVAQKTVEGAGSIAAATGFVKKDQLGKN-EEGAPQEGILEDM---P | 117 |
| Sumatran orangutan (P61146)            | 72 | TGVTAVAQKTVEGAGSIAAATGFVKKDQLGKN-EEGATQEGILEDM---P | 117 |

|                              |    |                                                    |     |
|------------------------------|----|----------------------------------------------------|-----|
| Pig (Q3I5G7)                 | 72 | TGVTAVAQKTVEGAGSIAAATGFGKKDQLGKN-EEGAPQEGILEDM---P | 117 |
| Bovin (Q3T0G8)               | 72 | TGVTAVAQKTVEGAGSIAAATGFGKKDHMGKG-EEGASQEGILEDM---P | 117 |
| Human (P37840-2)             | 72 | TGVTAVAQKTVEGAGSIAAATGFVKKDQLGK-----               | 102 |
| African clawed frog (Q7SZ02) | 72 | TGVTAVAHKTVEGAGNFAAATGLVKKDQKNES---GFGPEGTMENSENMP | 118 |
| Zebra finch (B5G012)         | 72 | TGVTAVAQKTVEGAGNIAASHWLGEEGPVGQT-----E-----        | 104 |
| Japanese pufferfish (Q3LU31) | 68 | TGVTAVAQKTVESAGSIAAATGLVKKKEPGKQG-DDAAPEN-MAES---- | 111 |
| Northern pike (C1BYT3)       | 97 | TGVTAVAHKTVEGAGNIAAATGLVKKDPAKQE-EDTLKSDSPVKES---- | 141 |

|                                        |     |                         |     |
|----------------------------------------|-----|-------------------------|-----|
| Zebra Finch (Q4JHT6)                   | 121 | VDPENEAYEMPPEEEYQDYEPEA | 143 |
| Zebra Finch (B5G014)                   | 121 | VDPENEAYEMPPEEEYQDYEPEA | 143 |
| Zebra Finch (B5G015)                   | 121 | VDPENEAYEMPPEEEYQDYEPEA | 143 |
| Island canary (Q91448)                 | 121 | VDPDNEAYEMPPEEEYQDYEPEA | 143 |
| Chicken (Q9I9H1)                       | 121 | VDPENEAYEMPPEEEYQDYEPEA | 143 |
| Rat (P37377)                           | 118 | VDPSEAYEMPSEEGYQDYEPEA  | 140 |
| Mouse (O55042)                         | 118 | VDPGSEAYEMPSEEGYQDYEPEA | 140 |
| Common woolly monkey (P61141)          | 118 | VDPDNEAYEMPSEEGYQDYEPEA | 140 |
| Black-handed spider monkey (P61138)    | 118 | VDPDNEAYEMPSEEGYQDYEPEA | 140 |
| Red-chested mustached tamarin (P61147) | 118 | VDP-----                | 120 |
| Common squirrel monkey (D0FH84)        | 118 | VDPDNEAYEMPSEEGYQDYEPEA | 140 |
| Rhesus macaque (P61143)                | 118 | VDPDNEAYEMPSEEGYQDYEPEA | 140 |
| Crab-eating macaque (P61142)           | 118 | VDPDNEAYEMPSEEGYQDYEPEA | 140 |
| Red guenon (P61139)                    | 118 | VDPDNEAYEMPSEEGYQDYEPEA | 140 |
| Lowland gorilla (P61140)               | 118 | VDPDNEAYEMPSEEGYQDYEPEA | 140 |
| Human (P37840-3)                       | 104 | VDPDNEAYEMPSEEGYQDYEPEA | 126 |
| Human (P37840)                         | 118 | VDPDNEAYEMPSEEGYQDYEPEA | 140 |
| Pygmy chimpanzee (P61144)              | 118 | VDPDNEAYEMPSEEGYQDYEPEA | 140 |
| Chimpanzee (P61145)                    | 118 | VDPDNEAYEMPSEEGYQDYEPEA | 140 |

|                              |     |                         |     |
|------------------------------|-----|-------------------------|-----|
| Sumatran orangutan (P61146)  | 118 | VDPDNEAYEMPSEEGYQDYEP   | 140 |
| Pig (Q3I5G7)                 | 118 | VDPDNEAYEMPSEEGYQDYEP   | 140 |
| Bovin (Q3T0G8)               | 118 | VDPDNEAYEMPSEEGYQDYEP   | 140 |
| Human (P37840-2)             | 103 | -----EGYQDYEP           | 112 |
| African clawed frog (Q7SZ02) | 119 | VNPNNETYEMPPEEEYQDYDP   | 141 |
| Zebra finch (B5G012)         | 105 | -----                   |     |
| Japanese pufferfish (Q3LU31) | 112 | --PDVTDPAEATEEDADD----  | 127 |
| Northern pike (C1BYT3)       | 142 | --PVDTEGGNTTAEGHSDGY--- | 159 |
